# Supplementary material for: Which Neuropsychological Tests? Predicting Cognitive Decline and Dementia in Parkinson’s Disease in the ICICLE-PD Cohort
Source: PubMed Central journal article supplement (PMC8461722; doi:10.3233/jpd-212581), 2021-08-02

# Supplementary Material

## Which Neuropsychological Tests? Predicting Cognitive Decline and Dementia in Parkinson's Disease in the ICICLE-PD Cohort

### Supplementary Methods: Full Statistical Analysis

Statistical analysis was conducted using SPSS (IBM Corp. V.24, USA) and R software (Version 3.4.0; R Foundation for Statistical Computing, Vienna, Austria). Data were examined for normality of distribution with visual histograms and Kolmogorov-Smirnov's tests. Comparisons of means between two groups were performed using independent t-tests or Mann-Whitney U tests as appropriate. Ordinal data was compared using chi-squared tests. Survival and cumulative survival were calculated using Kaplan-Meier plots.

Within R, *lme4* [1] was used to perform linear mixed effects modelling (LMEM) to determine change in cognitive measures from baseline to 72 months. This form of multilevel modelling is suitable for longitudinal data analysis due to its ability to handle missing data [2], as it does not exclude subjects with missing data from the analysis. A random intercept model was used, where the intercept varied at the participant and time level. First, rate of change was modelled for all participants with group as a fixed effect, as well as interactions with time (group x time) to determine differences in rate of change of cognitive tests between Parkinson's disease (PD) participants and controls. For each cognitive test, sex, number of years of completed education, age and depression (Geriatric Depression Scale, GDS-15) were entered into the model as fixed effects. Secondly, change in cognitive scores of PD only participants was modelled, with cumulative dementia (PDD) diagnosis and interaction with time (PDD x time) included as fixed effects, to determine which tests were sensitive to change in those who developed PDD within six years. For each cognitive test, sex, number of years of completed education, age, time, disease severity (Movement Disorders Society

Unified Parkinson's Disease Rating Scale, MDS-UPDRS III x time) and depression (GDS-15) were entered into the model as fixed effects.

Backwards stepwise Cox regression identified baseline predictors of PDD using a data driven approach. Initial co-variates were: baseline age, gender, years of education, levodopa equivalent daily dose (LEDD), MDS-UPDRS III score, and GDS-15 were included in the model; non-significant predictors were excluded to provide a basic model. To aid interpretation, age, years of education, LEDD and MDS-UPDRS III were dichotomised using median scores; a score of  $GDS-15 \geq 10$  was used to classify depression. Cognitive scores were dichotomised as impaired using: i) cut-offs at 1SD, 1.5SD and 2SD below control mean scores, and ii) using median scores (Supplementary Table 3). An additional model using impaired median scores and pen and paper only tests (Montreal Cognitive Assessment [MoCA], Mini-Mental State Examination [MMSE], semantic fluency, phonemic fluency and pentagon copying) was performed to identify tests which may be useful in a clinical setting. Impairment on each cognitive test, at the respective cut-off, was added to the basic model and a backwards step-wise Cox regression was used to identify non-significant predictors. Finally, baseline mild cognitive impairment (PD-MCI) classification using 1SD, 1.5SD and 2SD cut-offs was also added to the basic model. Model fit was assessed using log likelihood ratios and area under the curve (AUC) was calculated for each model using receiver operating characteristic (ROC) curves. For all analysis, we applied Benjamini-Hochberg multiple comparisons correction with a 5% false discovery.

## REFERENCES

- [1] Bates DM, Mächler M, Bolker B, Walker S (2014) lme4: Linear mixed-effects models using Eigen and S4. *J Stat Softw*.
- [2] Verbeke G, Molenberghs G, Rizopoulos D (2009) *Linear mixed models for longitudinal data*. Springer Science & Business Media.

**Supplementary Table 1. Description of neuropsychological tests and measures in each cognitive domain**

| <b>Cognitive domain</b>             | <b>Neuropsychological test</b>           | <b>Measure</b>                                                      |
|-------------------------------------|------------------------------------------|---------------------------------------------------------------------|
| <i>Global cognition</i>             | MoCA                                     | Total score                                                         |
|                                     | MMSE                                     | Total score                                                         |
| <i>Visuospatial function</i>        | Pentagon copying from the MoCA           | Modified 0 to 2 rating scale <sup>1</sup>                           |
| <i>Language</i>                     | Naming item from the MoCA                | Number correct (0-3)                                                |
|                                     | Sentence item from the MoCA              | Number correct (0-2)                                                |
| <i>Executive function</i>           | Phonemic Fluency                         | Number of words named                                               |
|                                     | Semantic Fluency                         | Number of animals named                                             |
|                                     | CANTAB: One Touch Stockings (OTS)        | Number solved on first choice                                       |
| <i>Memory</i>                       | CANTAB: Paired Recognition Memory (PRM)  | Number correct, percentage correct                                  |
|                                     | CANTAB: Spatial Recognition Memory (SRM) | Number correct, percentage correct                                  |
|                                     | CANTAB: Paired Associated Learning (PAL) | Stages complete, total errors, total trials, mean trials to success |
| <i>Attention</i>                    | CDR: Simple Reaction Time (SRT)          | Mean reaction time (ms)                                             |
|                                     | CDR: Choice Reaction Time (CRT)          | Mean reaction time (ms), accuracy of correct responses (%)          |
|                                     | CDR: Digit vigilance (DV)                | Mean reaction time (ms), accuracy of correct responses (%)          |
|                                     | CDR: Power of Attention (PoA)            | Composite score of SRT, CRT and DV reaction times (ms)              |
|                                     | CDR: PoA reaction time variability       | Coefficient of variance (CoV, %)                                    |
|                                     | CDR: Continuity of attention             | Number of correct responses from CRT and DV                         |
|                                     | CDR: Cognitive reaction time             | Mean difference in reaction time between SRT and CRT (ms)           |
| <i>Spatial working memory (SWM)</i> | CDR: SWM original stimuli                | Mean reaction time (ms), accuracy of correct responses (%)          |
|                                     | CDR: SWM new stimuli                     | Mean reaction time (ms), accuracy of correct responses (%)          |
|                                     | CDR: SWM sensitivity index (SI)          | Number of correct responses from SWM original and new stimuli       |
|                                     | CDR: SWM mean speed                      | Mean reaction time of SWM original and new stimuli                  |

MoCA, Montreal Cognitive Assessment; MMSE, Mini-Mental State Examination; CANTAB, Cambridge Neuropsychological Test Automated Battery; CDR, Cognitive Drug Research.

<sup>1</sup>Ala TA, Hughes LF, Kyrouac GA, Ghobrial MW, Elble RJ (2001) Pentagon copying is more impaired in dementia with Lewy bodies than in Alzheimer's disease. *J Neurol Neurosurg Psychiatry* **70**, 483-488.

**Supplementary Table 2. Missing cognitive data**

|                             | <b>Baseline<br/>(n=212)</b>                             | <b>18 months<br/>(n=191)</b>                                                           | <b>36 months<br/>(n=157)</b>                             | <b>54 months<br/>(n=128)</b>    | <b>72 months<br/>(n=105)</b>     |
|-----------------------------|---------------------------------------------------------|----------------------------------------------------------------------------------------|----------------------------------------------------------|---------------------------------|----------------------------------|
| <i>MoCA</i>                 | Introduced later<br>in study (n=24)                     | Missing data<br>(n=1)                                                                  | Missing data<br>(n=6)                                    | No missing data                 | Missing data<br>(n=4)            |
| <i>MMSE</i>                 | No missing data                                         | No missing data                                                                        | No missing data                                          | Missing data<br>(n=1)           | Missing data<br>(n=2)            |
| <i>CDR</i>                  | Equipment<br>failure (n=2)                              | Missing data<br>(n=3)                                                                  | Data collection<br>problems<br>(n=36)                    | Change in<br>protocol<br>(n=75) | Change in<br>protocol<br>(n=105) |
| <i>CANTAB</i>               | Visual<br>impairment<br>(n=3),<br>missing data<br>(n=8) | Visual<br>impairment<br>(n=2),<br>missing data<br>(n=1),<br>equipment<br>failure (n=1) | Visual<br>impairment<br>(n=1),<br>missing data<br>(n=10) | Change in<br>protocol<br>(n=51) | Change in<br>protocol<br>(n=105) |
| <i>Phonemic<br/>fluency</i> | Missing data<br>(n=2)                                   | Missing data<br>(n=1)                                                                  | Missing data<br>(n=3)                                    | No missing data                 | Missing data<br>(n=6)            |
| <i>Semantic<br/>fluency</i> | Missing data<br>(n=3)                                   | Missing data<br>(n=2)                                                                  | Missing data<br>(n=4)                                    | Missing data<br>(n=2)           | Missing data<br>(n=3)            |

MoCA, Montreal Cognitive Assessment; CDR, Cognitive Drug Research; CANTAB, Cambridge Neuropsychological Test Automated Battery.

**Supplementary Table 3. Cut-offs of baseline neuropsychological test**

| Cognitive domain              | Neuropsychological test                  | Cut-off |         |         |         |
|-------------------------------|------------------------------------------|---------|---------|---------|---------|
|                               |                                          | 1SD     | 1.5SD   | 2SD     | Median  |
| <b>Global cognition</b>       | <i>MoCA</i>                              | <24.5   | <23.2   | <22.0   | <26     |
|                               | <i>MMSE</i>                              | <27.9   | <27.3   | <26.7   | <29     |
| <b>Executive function</b>     | <i>Phonemic Fluency</i>                  | <8.3    | <6.0    | <3.6    | <11     |
|                               | <i>Semantic Fluency</i>                  | <17.7   | <14.7   | <11.6   | <21     |
|                               | <i>OTS number solved on first choice</i> | <13.9   | <12.6   | <11.4   | <15     |
| <b>Memory</b>                 | <i>PRM number correct</i>                | <18.2   | <17.0   | <15.8   | <20     |
|                               | <i>PRM % correct</i>                     | <76.0   | <70.9   | <65.8   | <83.3   |
|                               | <i>SRM number correct</i>                | <71.5   | <66.9   | <62.3   | <15     |
|                               | <i>SRM % correct</i>                     | <14.3   | <13.4   | <12.5   | <75     |
|                               | <i>PAL stages complete</i>               | <7.2    | <6.9    | <6.7    | <7      |
|                               | <i>PAL total errors</i>                  | >33.7   | >41.0   | >48.2   | >18     |
|                               | <i>PAL total trials</i>                  | >17.7   | >19.6   | >21.4   | >14     |
|                               | <i>PAL mean trials to success</i>        | >2.4    | >2.7    | >2.9    | >2      |
| <b>Attention</b>              | <i>SRT mean</i>                          | >378.3  | >409.8  | >441.3  | >333.4  |
|                               | <i>Digit vigilance accuracy</i>          | <90.2   | <87.3   | <84.4   | <97.8   |
|                               | <i>Digit vigilance mean</i>              | >496.8  | >519.2  | >541.6  | >473.0  |
|                               | <i>CRT accuracy</i>                      | <94.3   | <92.9   | <91.6   | <98     |
|                               | <i>CRT Mean</i>                          | >571.0  | >601.1  | >631.3  | >524.7  |
|                               | <i>PoA</i>                               | >1413.8 | >1481.8 | >1549.8 | >1341.6 |
|                               | <i>PoA CoV</i>                           | >60.4   | >65.5   | >70.5   | >51.8   |
|                               | <i>Continuity of attention</i>           | <88.3   | <86.5   | <84.8   | <92     |
|                               | <i>Cognitive reaction time</i>           | >248.9  | >275.7  | >302.5  | >192.1  |
| <b>Spatial working memory</b> | <i>SWM original accuracy</i>             | <83.6   | <78.6   | <73.6   | <100    |
|                               | <i>SWM new accuracy</i>                  | <82.2   | <76.2   | <70.2   | <100    |
|                               | <i>SWM SI</i>                            | <0.7    | <0.6    | <0.5    | <1      |
|                               | <i>SWM original speed</i>                | <1577.4 | <1805.5 | <2033.7 | <1056   |
|                               | <i>SWM new speed</i>                     | <1498.5 | <1664.4 | <1830.3 | <1148   |
|                               | <i>SWM mean speed</i>                    | <1559.3 | <1762.5 | <1965.7 | <1117   |
| <b>Visuospatial function</b>  | <i>Pentagons</i>                         | <2      | <2      | <1      | <2      |
| <b>Language</b>               | <i>Naming</i>                            | <3      | <3      | <2      | <3      |
|                               | <i>Sentence</i>                          | <2      | <1      | <1      | <2      |

MoCA, Montreal Cognitive Assessment; MMSE, Mini-Mental State Examination; OTS, One Touch Stockings; PRM, paired recognition memory; SRM, spatial recognition memory; PAL, paired associated learning; CRT, choice reaction time; CoV, coefficient of variance; PoA, power of attention; CoV, coefficient of variance; SWM, spatial working memory

**Supplementary Table 4. Neuropsychological tests modelled over time in PD vs. PDD participants controlling for baseline PD-MCI**

| Cognitive domain                             | Neuropsychological test                 | PD vs. PDD participants <sup>a</sup> |              |       |              |            |              |
|----------------------------------------------|-----------------------------------------|--------------------------------------|--------------|-------|--------------|------------|--------------|
|                                              |                                         | Time                                 |              | PDD   |              | Time x PDD |              |
|                                              |                                         | $\beta$                              | p            | B     | p            | $\beta$    | p            |
| <b>Global cognition</b>                      | MoCA*                                   | 0.8                                  | <0.001       | -1.8  | <0.001       | -0.7       | <0.001       |
|                                              | MMSE*                                   | 0.4                                  | <b>0.006</b> | -0.4  | 0.075        | -0.9       | <0.001       |
| <b>Executive function and Verbal fluency</b> | <i>Phonemic Fluency</i> *               | 1.6                                  | <0.001       | -1.5  | 0.095        | -1.1       | <b>0.002</b> |
|                                              | <i>Semantic Fluency</i> *               | 0.8                                  | 0.026        | -2.4  | <b>0.016</b> | -1.3       | <0.001       |
|                                              | <i>OTS no. solved on first choice</i> † | -0.7                                 | 0.911        | -4.2  | 0.454        | 7.1        | 0.404        |
| <b>Memory</b>                                | <i>PRM number correct</i> †             | 0.3                                  | 0.180        | -0.8  | 0.127        | -0.7       | <b>0.003</b> |
|                                              | <i>PRM % correct</i> †                  | 1.2                                  | 0.196        | -3.0  | 0.134        | -2.9       | <b>0.003</b> |
|                                              | <i>SRM number correct</i> †             | -0.2                                 | 0.278        | -1.2  | <b>0.001</b> | -0.2       | 0.472        |
|                                              | <i>SRM % correct</i> †                  | -1.2                                 | 0.265        | -5.6  | <b>0.001</b> | -0.6       | 0.569        |
|                                              | <i>PAL stages complete</i> †            | 0.0                                  | 0.675        | -0.3  | 0.150        | -0.1       | 0.298        |
|                                              | <i>PAL total errors</i> †               | -1.5                                 | 0.293        | -1.8  | 0.528        | 2.7        | 0.051        |
|                                              | <i>PAL total trials</i> †               | -0.2                                 | 0.747        | -1.3  | 0.115        | 2.0        | <0.001       |
|                                              | <i>PAL mean trials to success</i> †     | -0.1                                 | 0.434        | 0.1   | 0.412        | 0.3        | <0.001       |
| <b>Attention</b>                             | <i>SRT mean</i> †                       | -18.2                                | 0.165        | 7.8   | 0.669        | 18.3       | 0.138        |
|                                              | <i>Digit vigilance accuracy</i> †       | 1.9                                  | 0.053        | -3.9  | 0.053        | -4.3       | <0.001       |
|                                              | <i>Digit vigilance mean</i> †           | -6.2                                 | 0.185        | 26.0  | <b>0.005</b> | -0.6       | 0.891        |
|                                              | <i>CRT accuracy</i> †                   | 0.3                                  | 0.361        | -0.6  | 0.229        | -0.8       | <b>0.021</b> |
|                                              | <i>CRT Mean</i> †                       | 6.9                                  | 0.514        | 35.0  | <b>0.020</b> | 41.1       | <0.001       |
|                                              | <i>PoA</i> †                            | -11.3                                | 0.631        | 65.4  | 0.059        | 58.7       | <b>0.011</b> |
|                                              | <i>PoA CoV</i> †                        | 1.0                                  | 0.406        | 0.5   | 0.771        | 4.1        | <0.001       |
|                                              | <i>Continuity of attention</i> †        | 1.0                                  | 0.031        | -2.2  | <b>0.022</b> | -2.3       | <0.001       |
|                                              | <i>Cognitive reaction time</i> †        | 11.7                                 | 0.234        | 23.9  | 0.128        | 12.0       | 0.192        |
| <b>Spatial working memory</b>                | <i>SWM original accuracy</i> †          | -0.1                                 | 0.952        | -4.5  | 0.083        | -1.9       | 0.226        |
|                                              | <i>SWM new accuracy</i> †               | -3.8                                 | 0.051        | -0.1  | 0.981        | -4.7       | <b>0.015</b> |
|                                              | <i>SWM SI</i> †                         | 0.0                                  | 0.306        | 0.0   | 0.311        | -0.1       | 0.042        |
|                                              | <i>SWM original speed</i> †             | -8.9                                 | 0.913        | 217.2 | <b>0.020</b> | 256.6      | <b>0.002</b> |
|                                              | <i>SWM new speed</i> †                  | 31.0                                 | 0.668        | 211.5 | <b>0.032</b> | 236.9      | <b>0.001</b> |
|                                              | <i>SWM mean speed</i> †                 | 13.0                                 | 0.866        | 207.0 | <b>0.023</b> | 266.1      | <b>0.001</b> |

Significant results after Benjamini–Hochberg procedure are highlighted in bold p<0.023.

<sup>a</sup>Covariates included in the model: age, MDS-UPDRS III, Sex, GDS-15, Education, Time x MDS-UPDRS III, PD-MCI.

\* Time points included: baseline, 18, 36, 54, and 72 months; †Time points included: baseline, 18, 36, and 54 months.

PD, Parkinson's disease; PDD, Parkinson's disease dementia; PD-MCI, Parkinson's disease with mild cognitive impairment using 1.5 standard deviations below normative values; MoCA, Montreal Cognitive Assessment; MMSE, Mini-Mental State Examination; OTS, One Touch Stockings; PRM, paired recognition memory; SRM, spatial recognition memory; PAL, paired associated learning; CRT, choice reaction time; CoV, coefficient of variance; PoA, power of attention; CoV, coefficient of variance; SWM, spatial working memory; MDS-UPDRS III, Movement Disorder Society Unified Parkinson's Disease Rating Scale; GDS-15, Geriatric Depression Scale.

**Supplementary Table 1. CONSORT diagram of PD and control group**

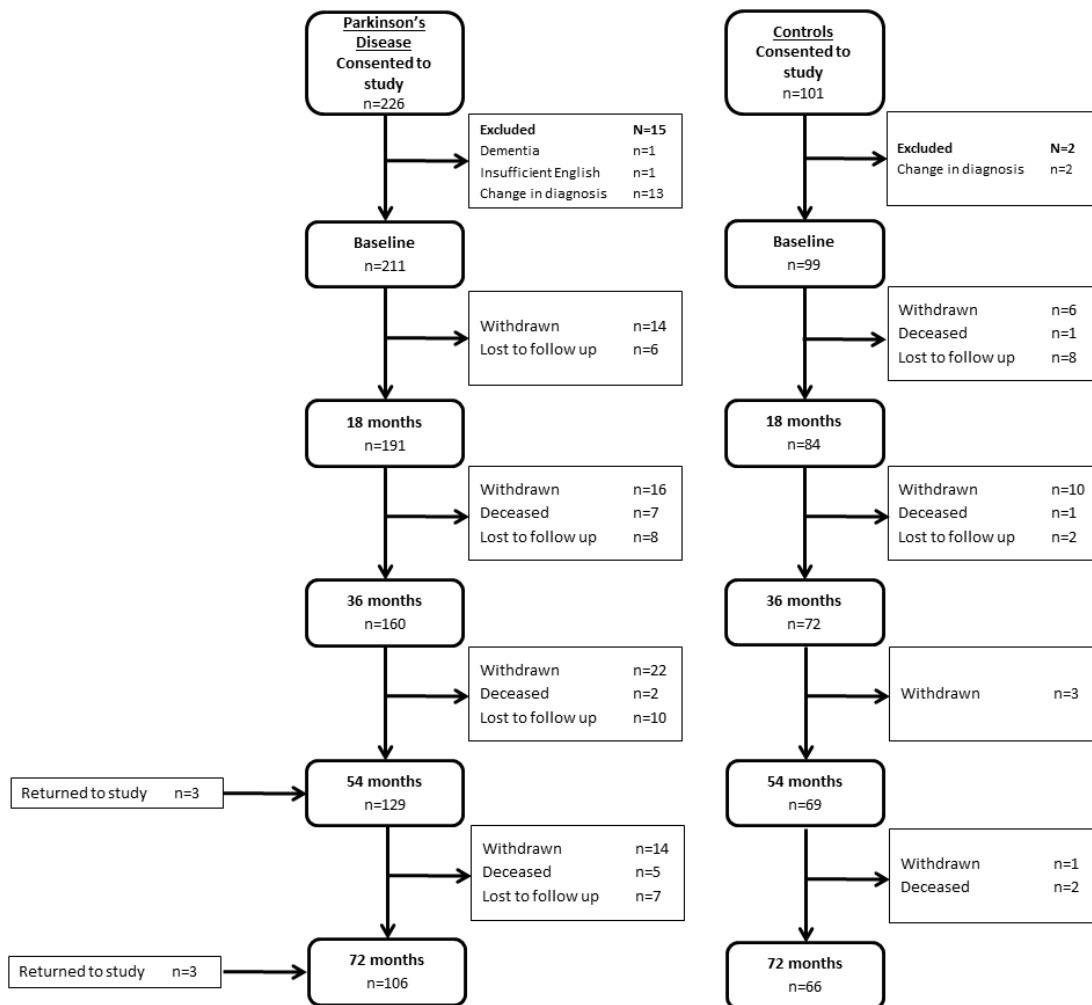

Supplement: jpd-11-jpd212581-s001.pdf [file jpd-11-jpd212581-s001.pdf]
